# Supplementary material for: Zwitterion-functionalized MIL-125-NH2-based thin-film nanocomposite forward osmosis membranes: towards improved performance for salt rejection and heavy metal removal
Source: Royal Society of Chemistry journal article supplement (doi:10.1039/d2nj02608b), 2022-01-01
Supplement: d2nj02608b1.pdf [file d2nj02608b1.pdf]

Supplementary information to:

**Zwitterion-functionalized MIL-125-NH<sub>2</sub> based thin-film nanocomposite forward osmosis membrane: Towards improved performance for salt rejection and heavy metal removal**

Arshad Bayrami,<sup>a</sup> Mojtaba Bagherzadeh,<sup>a\*</sup> Hossein Navi,<sup>a</sup> Mohammad Nikkhoo,<sup>b</sup> Mojtaba Amini,<sup>c</sup>

<sup>a</sup>Chemistry Department, Sharif University of Technology, P.O. Box 11155-3615, Tehran, Iran.

<sup>b</sup>Institute for Nanoscience and Nanotechnology (INST), Sharif University of Technology, Tehran, Iran.

<sup>c</sup>Department of Inorganic Chemistry, Faculty of Chemistry, University of Tabriz, Tabriz, Iran.

---

---

\*Corresponding author; Tel.: +98 21 66165354; fax: +98 21 66012983; Email address: [bagherzadeh@sharif.edu](mailto:bagherzadeh@sharif.edu) (M. Bagherzadeh).

## Materials and chemicals

Polyethersulfone (PES) (Ultrason® E 6020, Mw: 58,000) was purchased from BASF Co. Polyethylene glycol 300 (PEG-300), *m*-phenylenediamine (MPD), trimesoyl chloride (TMC), potassium carbonate ( $K_2CO_3$ ), sodium bicarbonate ( $NaHCO_3$ ), calcium chloride dihydrate ( $CaCl_2 \cdot 2H_2O$ ), magnesium sulfate ( $MgSO_4$ ), monopotassium phosphate ( $KH_2PO_4$ ), ammonium chloride ( $NH_4Cl$ ), *N,N*-dimethylformamide (DMF), *n*-hexane, methanol, and acetone were purchased from Merck Co. Copper(II) nitrate trihydrate ( $Cu(NO_3)_2 \cdot 3H_2O$ ), bovine serum albumin (BSA), titanium isopropoxide (TTIP), 2-aminoterephthalic acid (BDC-NH<sub>2</sub>), cyanuric chloride (CC), l-cysteine hydrochloride (l-Cys.HCl) and sodium alginate (SA) were purchased from Sigma Aldrich Co. Sodium chloride (NaCl) was purchased from Iranian Mineral Salts Companies. Except for acetone which must be dried before use, all other applied chemicals in the present work have been used without further purification.

## Instruments

Fourier transform infrared spectroscopy (FTIR) of nanofillers and membranes was recorded with a Unicam Matson1000 instrument with the wavenumber ranging from  $400\text{ cm}^{-1}$  to  $4000\text{ cm}^{-1}$ . Powder X-ray diffraction (XRD) patterns were collected by an XPERT-PRO diffractometer system (MPD PANalytical Company) within the  $2\theta$  range from  $5^\circ$  to  $80^\circ$  using a Cu K $\alpha$  radiation source. N<sub>2</sub> adsorption-desorption isotherms were recorded by using Belsorp-mini II instrument at  $-196^\circ\text{C}$ . The morphology and chemical compositions of the membranes were investigated by field emission scanning electron microscopy (FE-SEM) MIRA3 TESCAN-XMU model equipped with energy-dispersive X-ray spectroscopy (EDS). Before taking FE-SEM images, all samples were coated with a uniform thin layer of conductive gold or platinum metal. Furthermore, the structure and surface roughness of TFC and TFN-M<sub>x</sub> membranes were analyzed by atomic force microscope (AFM), ENTEGRA AFMNT-MDT model. Scanning area for each sample was  $5\ \mu\text{m} \times 5\ \mu\text{m}$  that scanned at a rate of 0.5 Hz. Water contact angle (WCA) analysis was employed to determine the hydrophilicity behavior of the fabricated membranes surface using a contact angle goniometer (Dataphysics, OCA 15 plus). The surface wettability of membranes was measured at least in five different points of each membrane surface and the data were averaged.

## **Membrane substrate preparation**

Primarily, the polymer powder was dried for daytime to eliminate remnant moisture before executing the next steps. For the preparation of PES membrane substrates, the casting solution was prepared by dissolving 2 g PES in a mixture of 5.6 g PEG and 8.4 g DMF for 6 h in ambient temperature <sup>1,2</sup>. The obtained solution was kept untouched for 24 hours to let enclosed air bubbles to leave. The membrane substrate was cast over a tidy polished glass plate exploiting a hand-casting knife with 150  $\mu$  in length and immediately dipped in a water bath to allow phase inversion reaction to begin. The final-resulting substrate was hoarded in fresh deionized water for 24 hours before any further modification or alteration.

EDS Layered Image 1

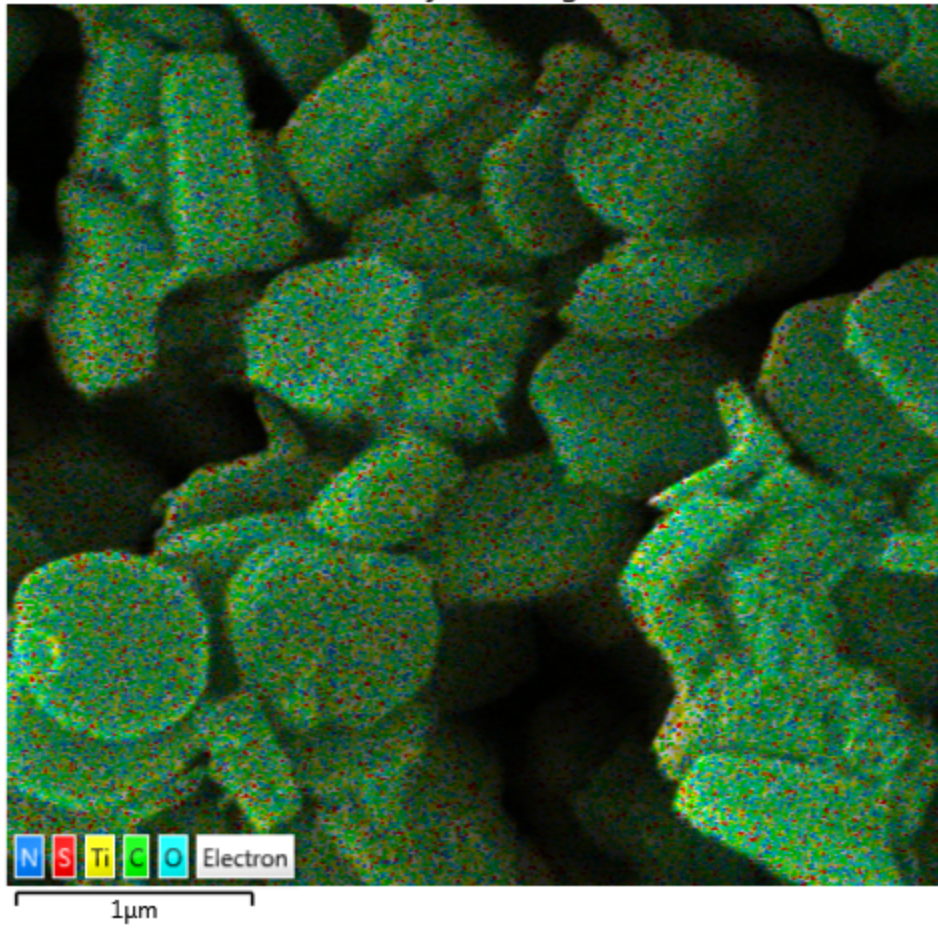

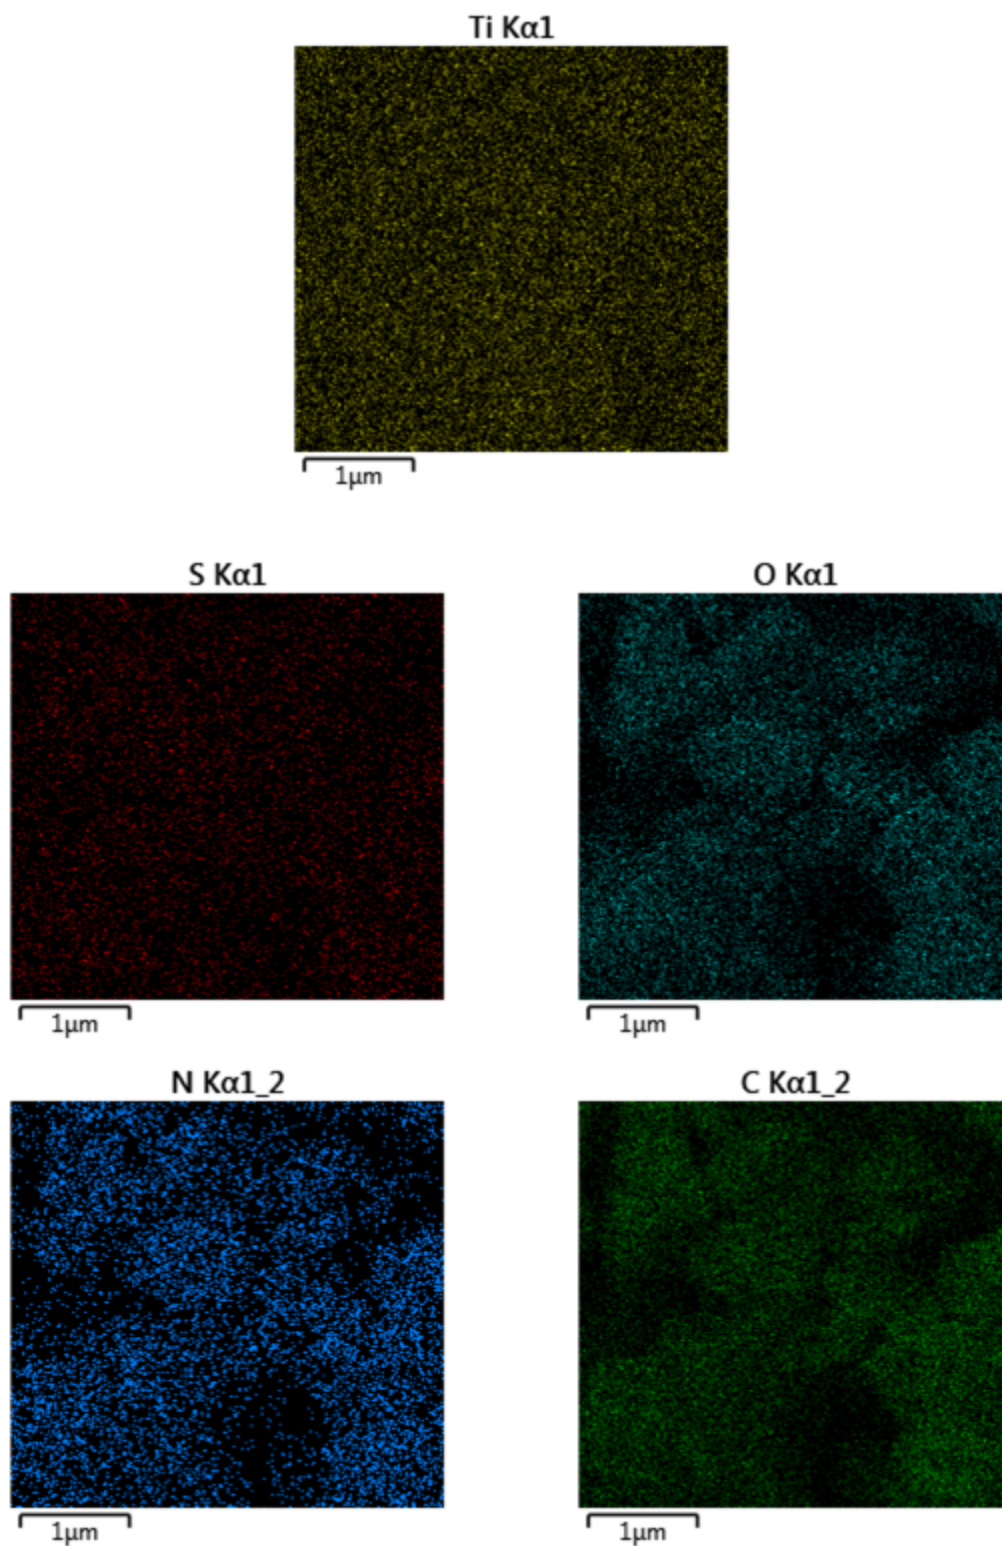

**Fig. S1** EDS elemental mapping of C, N, O, S, and Ti elements for MIL-125-NH-CC-Cys nanoparticles.

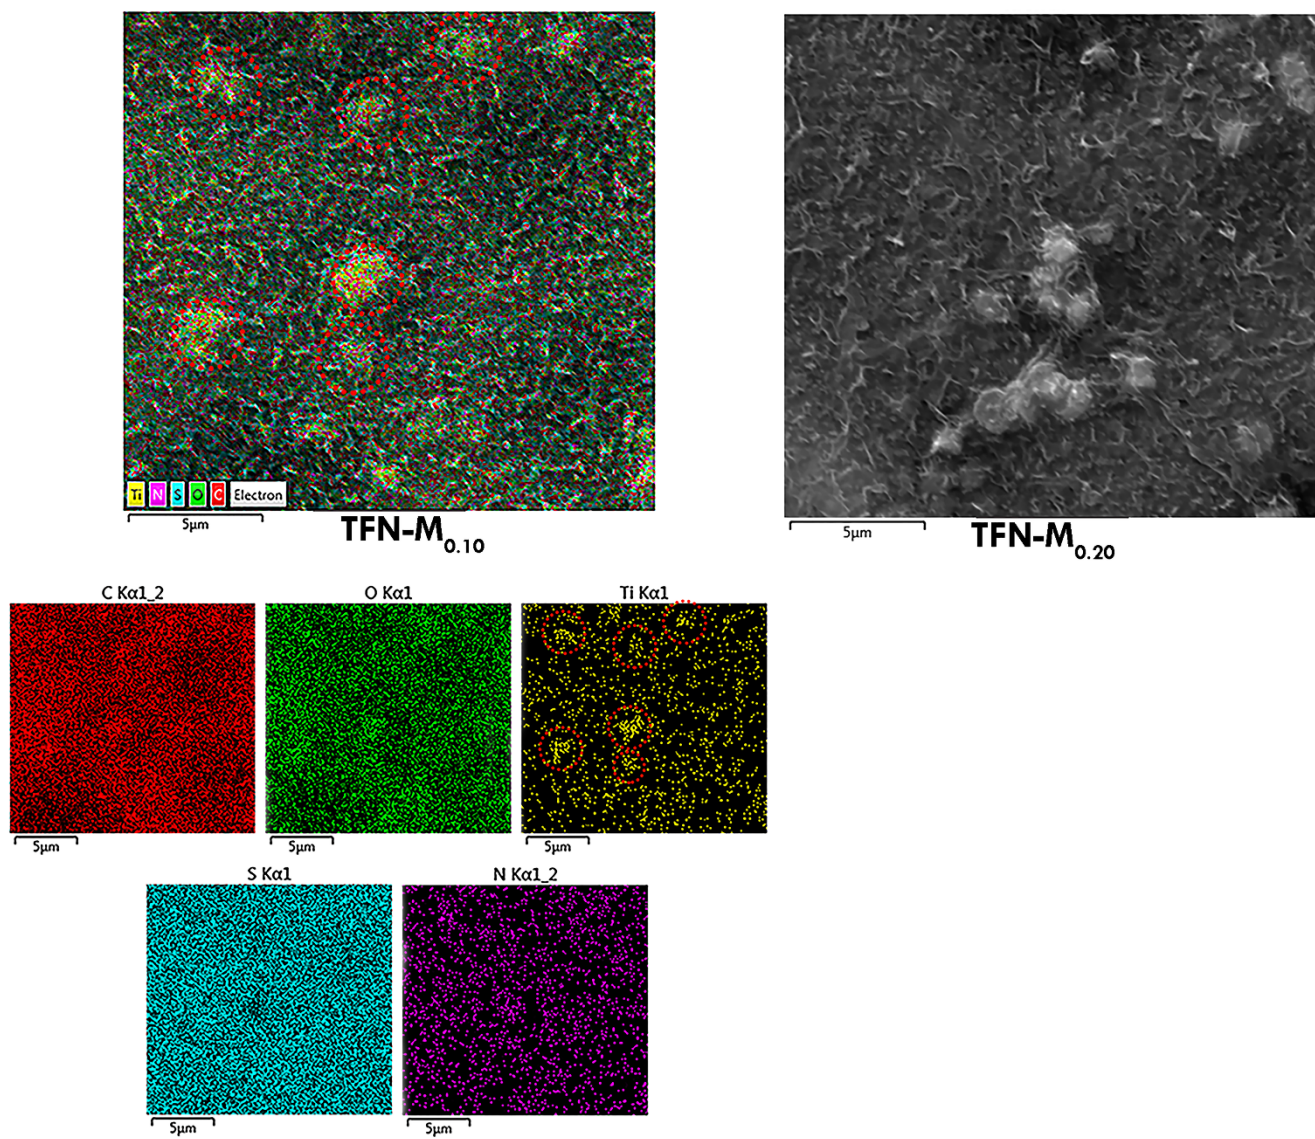

**Fig. S2** Top surface EDS elemental mapping of the TFN-M<sub>0.10</sub> (left) and top surface FESEM images of TFN-M<sub>0.20</sub> at NPs aggregation region (right).

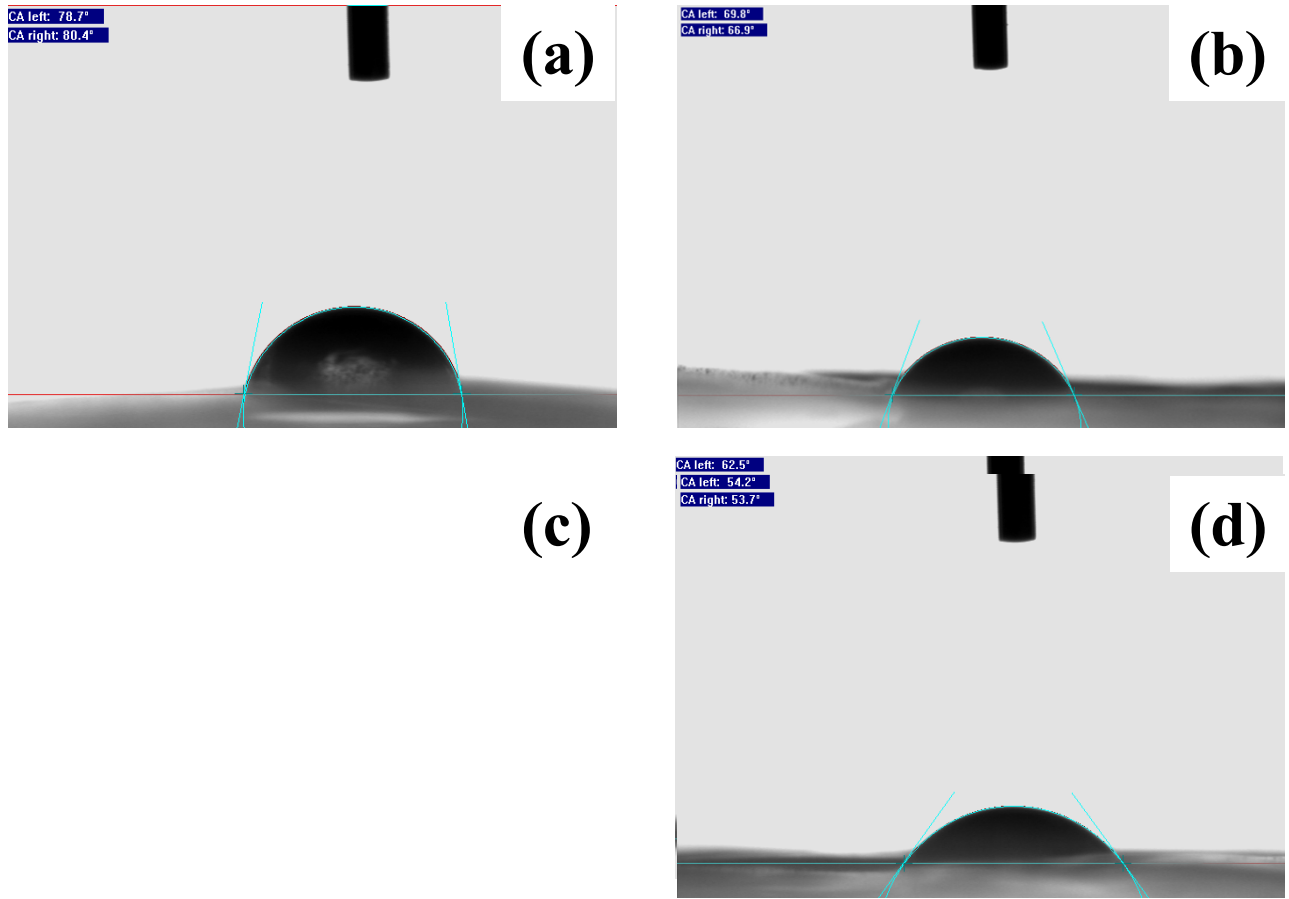

**Fig. S3** Selected water contact angle (WCA) images of the (a) TFC, (b) TFN-M<sub>100</sub>, (c) TFN-M<sub>200</sub> and (d) TFN-M<sub>400</sub> membranes.

**Table S1** A journey to the literature toward the comparison between different inorganic compounds as draw solute

| <b>The draw solute</b>                         | <b>pH (2 M condition)-<br/>Approximately</b> | <b>The osmotic pressure (2 M condition)-<br/>Approximately</b> | <b>Maximum M of the solubility</b> | <b>The flux of water (experimental data; <math>\mu\text{m s}^{-1}</math>)</b> | <b>The diffusion of reverse salt (<math>\text{g m}^{-2} \text{h}^{-1}</math>)</b> | <b>References</b> |
|------------------------------------------------|----------------------------------------------|----------------------------------------------------------------|------------------------------------|-------------------------------------------------------------------------------|-----------------------------------------------------------------------------------|-------------------|
| KNO <sub>3</sub>                               | 6                                            | 65                                                             | 3.3                                | 4.4                                                                           | 176                                                                               | 3                 |
| NH <sub>4</sub> H <sub>2</sub> PO <sub>4</sub> | 3.9                                          | 86                                                             | 3.7                                | 4.3                                                                           | 28.5                                                                              | 3                 |
| NaNO <sub>3</sub>                              | 6                                            | 81                                                             | 10.5                               | 5.7                                                                           | 85                                                                                | 3                 |
| NH <sub>4</sub> Cl                             | 4.7                                          | 88                                                             | 7.5                                | 5.3                                                                           | 64                                                                                | 3                 |
| NH <sub>4</sub> NO <sub>3</sub>                | 4.9                                          | 65                                                             | 84                                 | 4.1                                                                           | 228                                                                               | 3                 |
| Na <sub>2</sub> SO <sub>4</sub>                | 7.5                                          | 95                                                             | 1.8                                | 2.1                                                                           | 2.7                                                                               | 4,5               |
| NaCl                                           | 7                                            | 100                                                            | 5.5                                | 2.7                                                                           | 7.2                                                                               | 4,5               |
| MgCl <sub>2</sub>                              | 5.6                                          | 256                                                            | 5                                  | 2.3                                                                           | 4.8                                                                               | 4,5               |
| KHCO <sub>3</sub>                              | 8                                            | 80                                                             | 2                                  | 2.2                                                                           | 1.4                                                                               | 5                 |
| CaCl <sub>2</sub>                              | 6.3                                          | 218                                                            | 7.5                                | 2.6                                                                           | 8                                                                                 | 5                 |
| KCl                                            | 6.8                                          | 90                                                             | 4.6                                | 6.3                                                                           | 60                                                                                | 3                 |
| KBr                                            | 7                                            | 90                                                             | 4.5                                | 2.8                                                                           | 22                                                                                | 5                 |
| MgSO <sub>4</sub>                              | 6.7                                          | 55                                                             | 2.8                                | 1.5                                                                           | 1.2                                                                               | 4,5               |
| NH <sub>4</sub> HCO <sub>3</sub>               | 7.7                                          | 66                                                             | 3                                  | 2                                                                             | 18.5                                                                              | 5                 |
| K <sub>2</sub> SO <sub>4</sub>                 | 7.3                                          | 32                                                             | 3.6                                | 2.5                                                                           | 3.7                                                                               | 5                 |



**Table S2** Intrinsic permeability and structural parameters for TFC and TFN-M<sub>x</sub> membranes, which calculated by the Matlab-based algorithm.

| <b>Membrane</b>       | <b>A<br/>(LMH bar<sup>-1</sup>)</b> | <b>B<br/>(LMH)</b> | <b>S<br/>(μm)</b> | <b>B/A<br/>(bar)</b> | <b>R<sup>2</sup> (J<sub>w</sub>)</b> | <b>R<sup>2</sup> (J<sub>s</sub>)</b> |
|-----------------------|-------------------------------------|--------------------|-------------------|----------------------|--------------------------------------|--------------------------------------|
| TFC                   | 1.55 ± 0.21                         | 0.393 ± 0.037      | 417 ± 11          | 0.25                 | 0.97                                 | 0.97                                 |
| TFN-M <sub>0.05</sub> | 2.37 ± 0.14                         | 0.526 ± 0.024      | 419 ± 10          | 0.22                 | 0.95                                 | 0.95                                 |
| TFN-M <sub>0.10</sub> | 2.79 ± 0.12                         | 0.571 ± 0.025      | 405 ± 12          | 0.20                 | 0.99                                 | 0.99                                 |
| TFN-M <sub>0.20</sub> | 2.53 ± 0.10                         | 0.518 ± 0.022      | 401 ± 9           | 0.20                 | 0.96                                 | 0.96                                 |

**Table S3** Comparison between the FO performances of TFN-M<sub>0.10</sub> membrane with relevant previously reported membranes

| Entry | Membranes with filler wt.% (Nanoparticles) | Feed and draw solution, respectively | $J_w$ (LMH) | $J_s$ (gMH) | $J_s/J_w$ (g/L) | Membrane orientation | Flux recovery ratios (FRR) in fouling experiment (%) |        | References   |
|-------|--------------------------------------------|--------------------------------------|-------------|-------------|-----------------|----------------------|------------------------------------------------------|--------|--------------|
|       |                                            |                                      |             |             |                 |                      | SA                                                   | BSA    |              |
| 1     | TFN-M <sub>0.10</sub><br>MIL-125-NH-CC-His | NaCl 1 M and DI water                | 39.56       | 10.56       | 0.27            | PRO                  | -                                                    | -      | Present work |
|       |                                            |                                      | 25.48       | 5.62        | 0.22            | FO                   | 87                                                   | 90     |              |
|       | 23.85                                      |                                      | 8.18        | 0.34        | PRO             | -                    | -                                                    |        |              |
|       | 15.85                                      |                                      | 4.94        | 0.32        | FO              | 68                   | 74                                                   |        |              |
| 2     | TFN-U2 (UiO-66)                            | NaCl 1 M and DI water                | 36.7        | 7.1         | 0.20            | PRO                  | -                                                    | -      | 6            |
|       |                                            |                                      | 20.7        | 4.3         | 0.21            | FO                   | NR*                                                  | NR     |              |
| 3     | M1<br>M2 (Ag-MOF)                          | NaCl 1 M and DI water                | ~31         | ~5.61       | ~0.18           | FO                   | ~77                                                  | NR     | 7            |
|       |                                            |                                      | ~23         | ~5.73       | ~0.25           |                      | ~60                                                  | NR     |              |
| 4     | TFN <sub>w0.2</sub><br>QNP@WPO<br>M        | NaCl 1 M and DI water                | 45.9        | 15.9        | 0.35            | PRO                  | -                                                    | -      | 8            |
|       |                                            |                                      | 30.2        | 8.5         | 0.35            | FO                   | ~>90                                                 | ~85-90 |              |
| 5     | TFN0.1<br>NaY                              | NaCl 1 M and DI water                | 38.7        | 15          | 0.39            | PRO                  | -                                                    | -      | 9            |
|       |                                            |                                      | 17.5        | 7.5         | 0.43            | FO                   | NR                                                   | NR     |              |
| 6     | TFN-2<br>LDH/GO                            | NaCl 1 M and DI water                | 23.6        | 6.9         | 0.29            | PRO                  | -                                                    | -      | 10           |
|       |                                            |                                      | 13.4        | 6.2         | 0.46            | FO                   | NR                                                   | NR     |              |
| 7     | HTI TFC (commercially available)           | NaCl 1 M and DI water                | 46.4        | 24.9        | 0.46            | PRO                  | -                                                    | -      | 11           |
|       |                                            |                                      | 22.9        | 6.4         | 0.34            | FO                   | NR                                                   | NR     |              |

\*Not reported

## References

- 1 M. Bagherzadeh, A. Bayrami, Z. Shekari and M. Amini, *Desalination*, 2021, **515**, 115181.
- 2 A. Bayrami, M. Bagherzadeh, H. Navi, M. Chegeni, M. Hosseinifard and M. Amini, *Desalination*, 2022, **521**, 115386.
- 3 S. Phuntsho, H. K. Shon, S. Hong, S. Lee and S. Vigneswaran, *J. Memb. Sci.*, 2011, **375**, 172–181.
- 4 C. H. Tan and H. Y. Ng, *Desalin. water Treat.*, 2010, **13**, 356–361.
- 5 A. Achilli, T. Y. Cath and A. E. Childress, *J. Memb. Sci.*, 2010, **364**, 233–241.
- 6 D. Ma, S. B. Peh, G. Han and S. B. Chen, *ACS Appl. Mater. Interfaces*, 2017, **9**, 7523–7534.
- 7 S. F. Seyedpour, M. Dadashi Firouzjaei, A. Rahimpour, E. Zolghadr, A. Arabi Shamsabadi, P. Das, F. Akbari Afkhami, M. Sadrzadeh, A. Tiraferri and M. Elliott, *ACS Appl. Mater. Interfaces*, 2020, **12**, 38285–38298.
- 8 A. Shakeri, H. Salehi, F. Ghorbani, M. Amini and H. Naslhajian, *J. Colloid Interface Sci.*, 2019, **536**, 328–338.
- 9 N. Ma, J. Wei, R. Liao and C. Y. Tang, *J. Memb. Sci.*, 2012, **405**, 149–157.
- 10 P. Lu, S. Liang, T. Zhou, X. Mei, Y. Zhang, C. Zhang, A. Umar and Q. Wang, *RSC Adv.*, 2016, **6**, 56599–56609.
- 11 J. Ren and J. R. McCutcheon, *Desalination*, 2014, **343**, 187–193.
